# Supplementary material for: Noninvasive Fetal Trisomy (NIFTY) test: an advanced noninvasive prenatal diagnosis methodology for fetal autosomal and sex chromosomal aneuploidies
Source: PubMed Central journal article supplement (PMC3544640; doi:10.1186/1755-8794-5-57), 2012-12-01

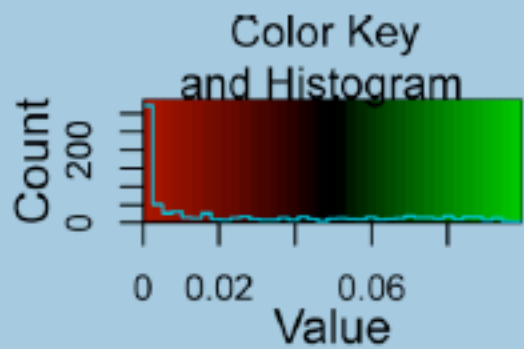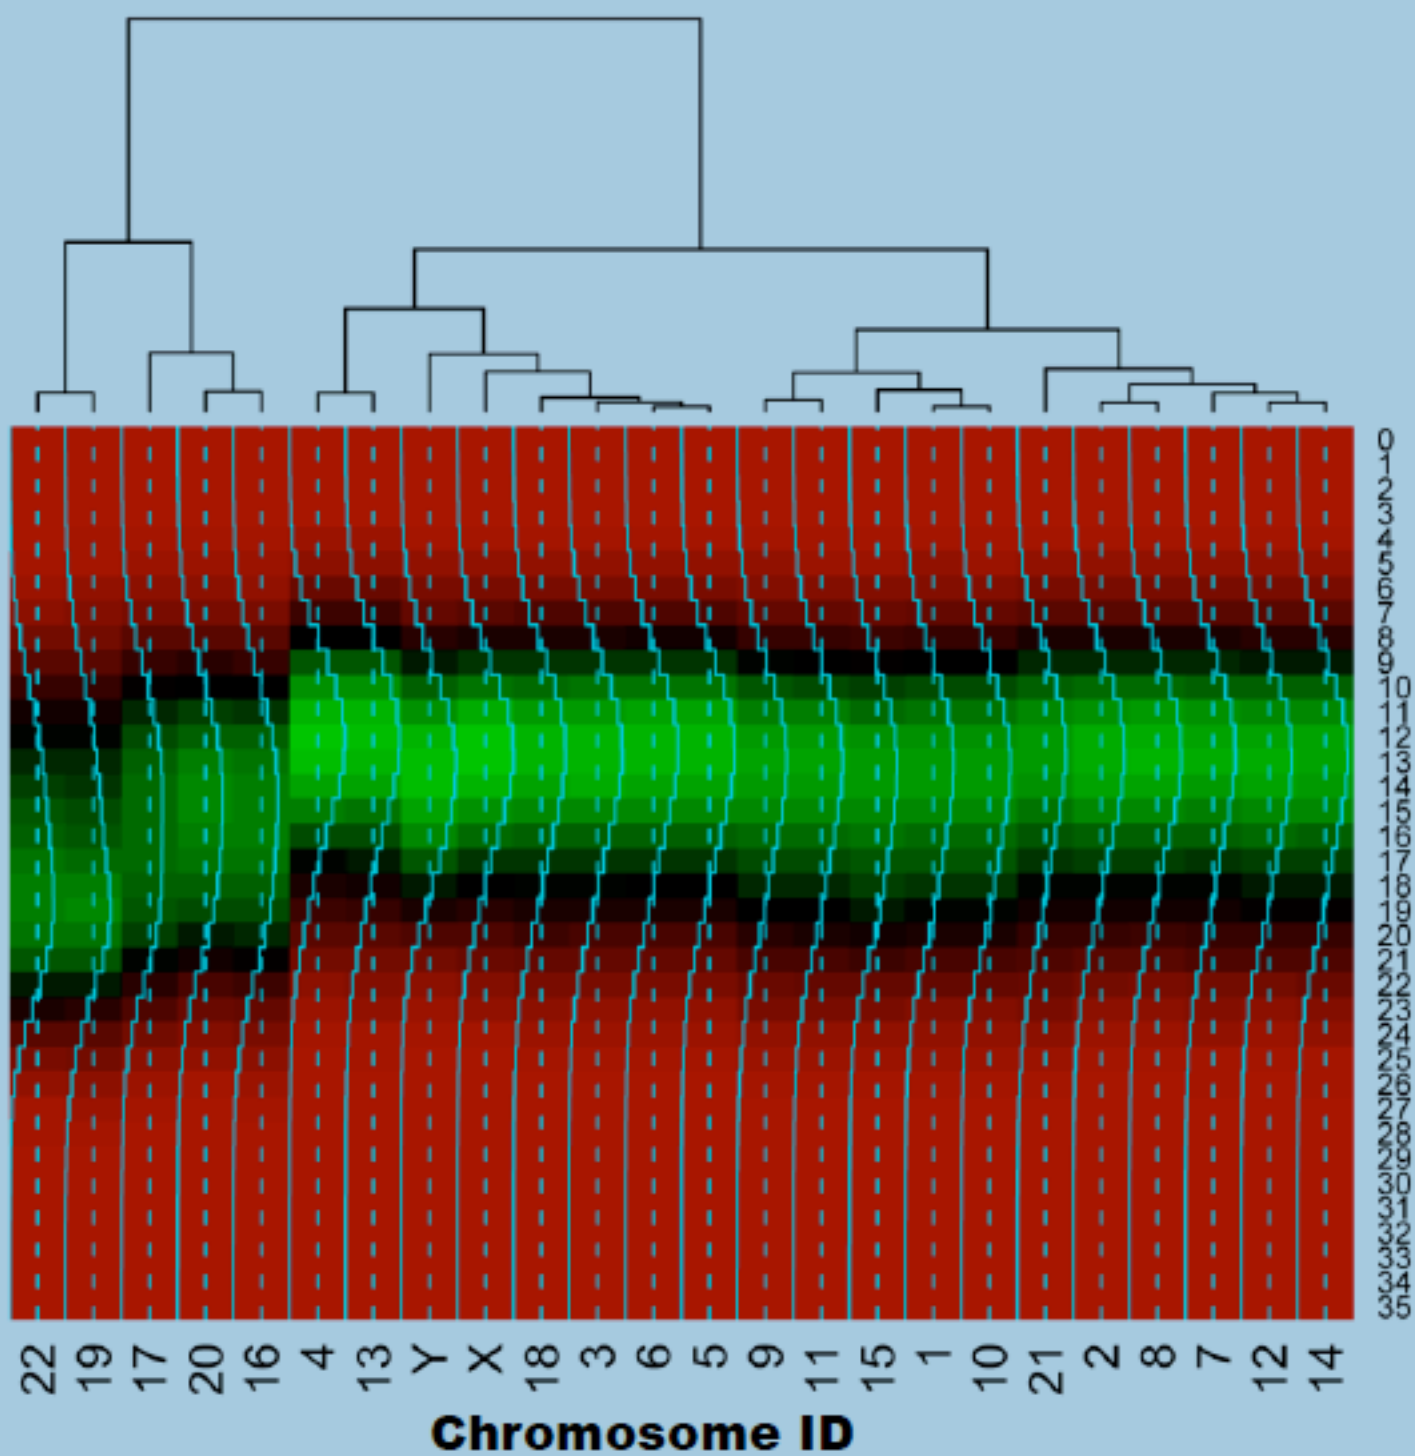

Supplement: 1755-8794-5-57-S3.pdf [file 1755-8794-5-57-S3.pdf]
