# Supplementary material for: Noninvasive Fetal Trisomy (NIFTY) test: an advanced noninvasive prenatal diagnosis methodology for fetal autosomal and sex chromosomal aneuploidies
Source: PubMed Central journal article supplement (PMC3544640; doi:10.1186/1755-8794-5-57), 2012-12-01
Supplement: 1755-8794-5-57-S7.pdf [file 1755-8794-5-57-S7.pdf]

sensitivity of chr13 of female

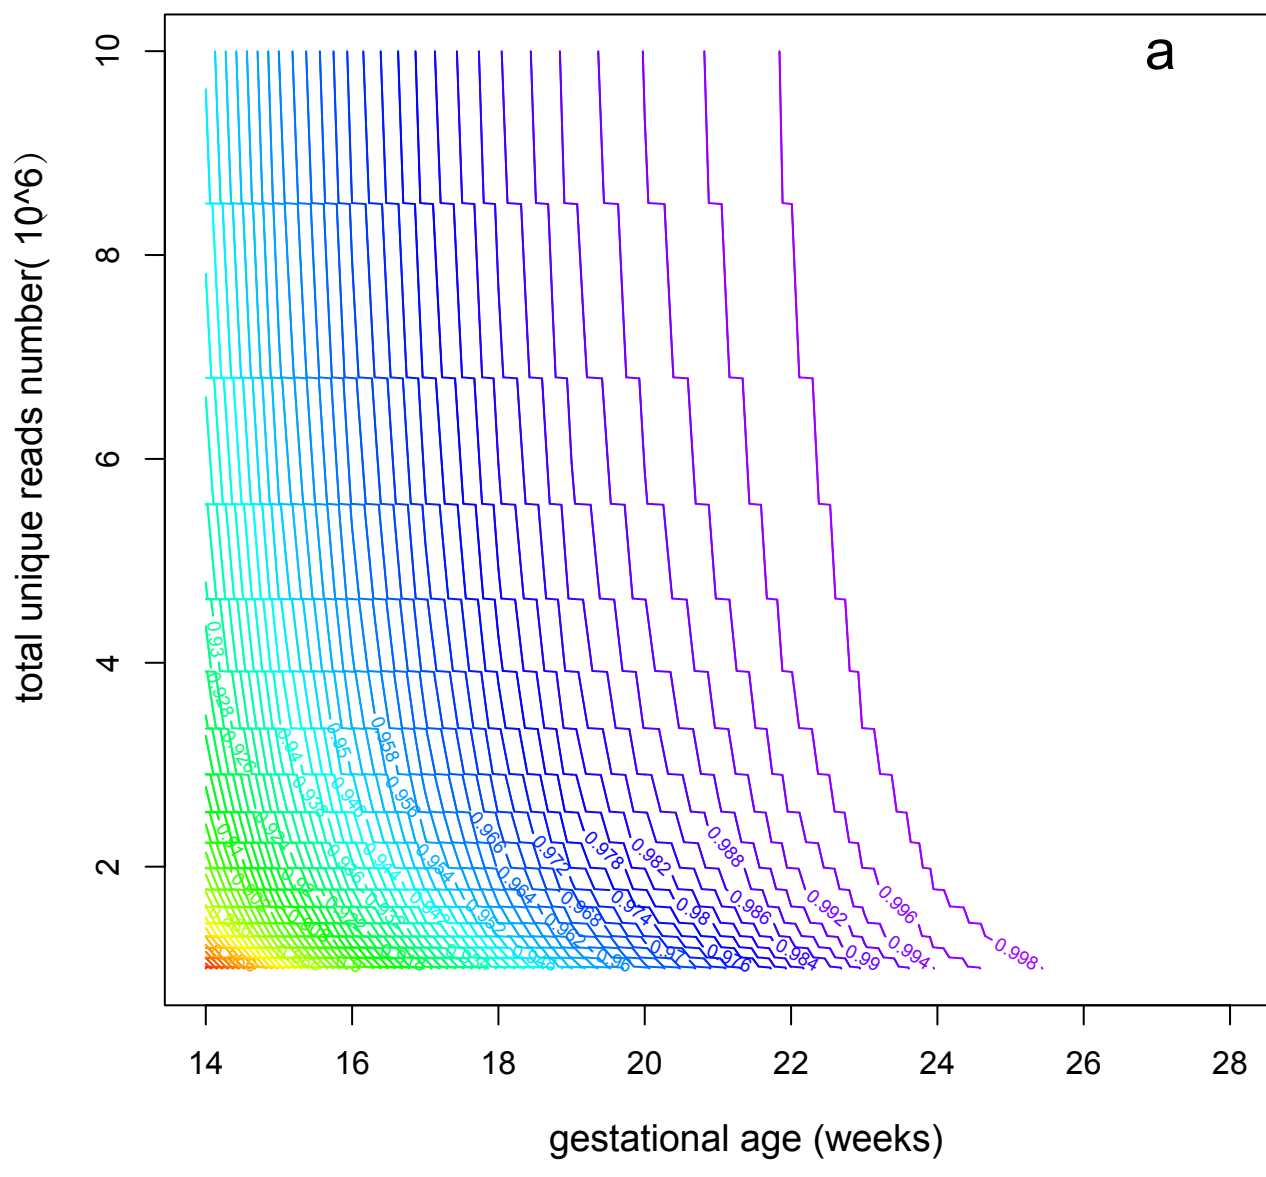

sensitivity of chr13 of male

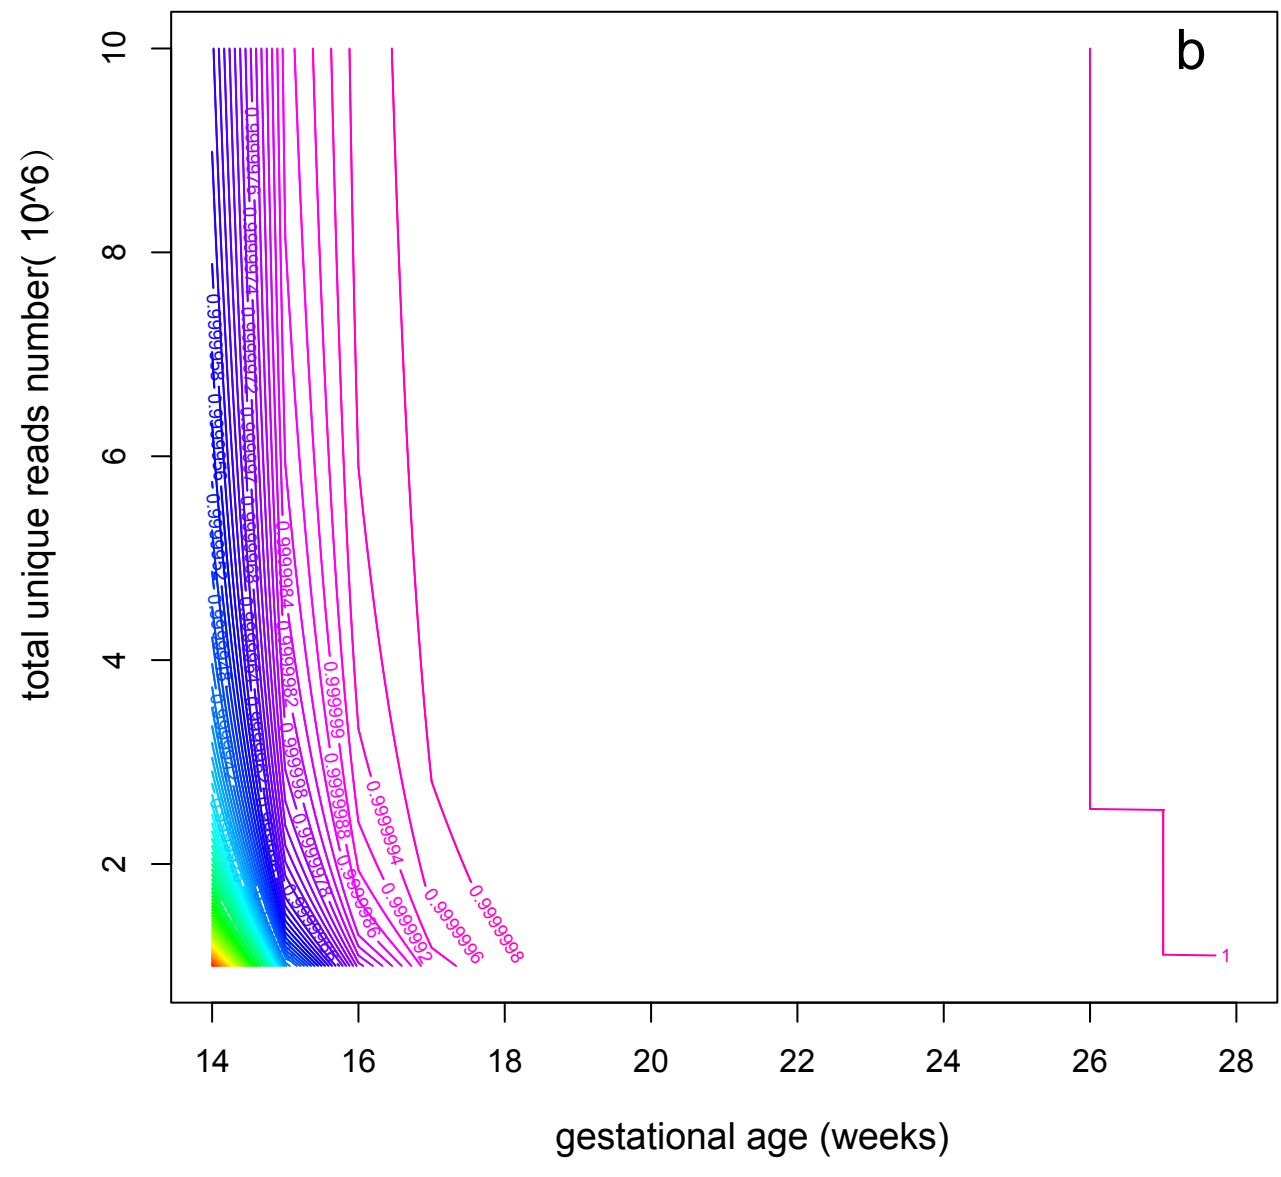

sensitivity of chr18 of female

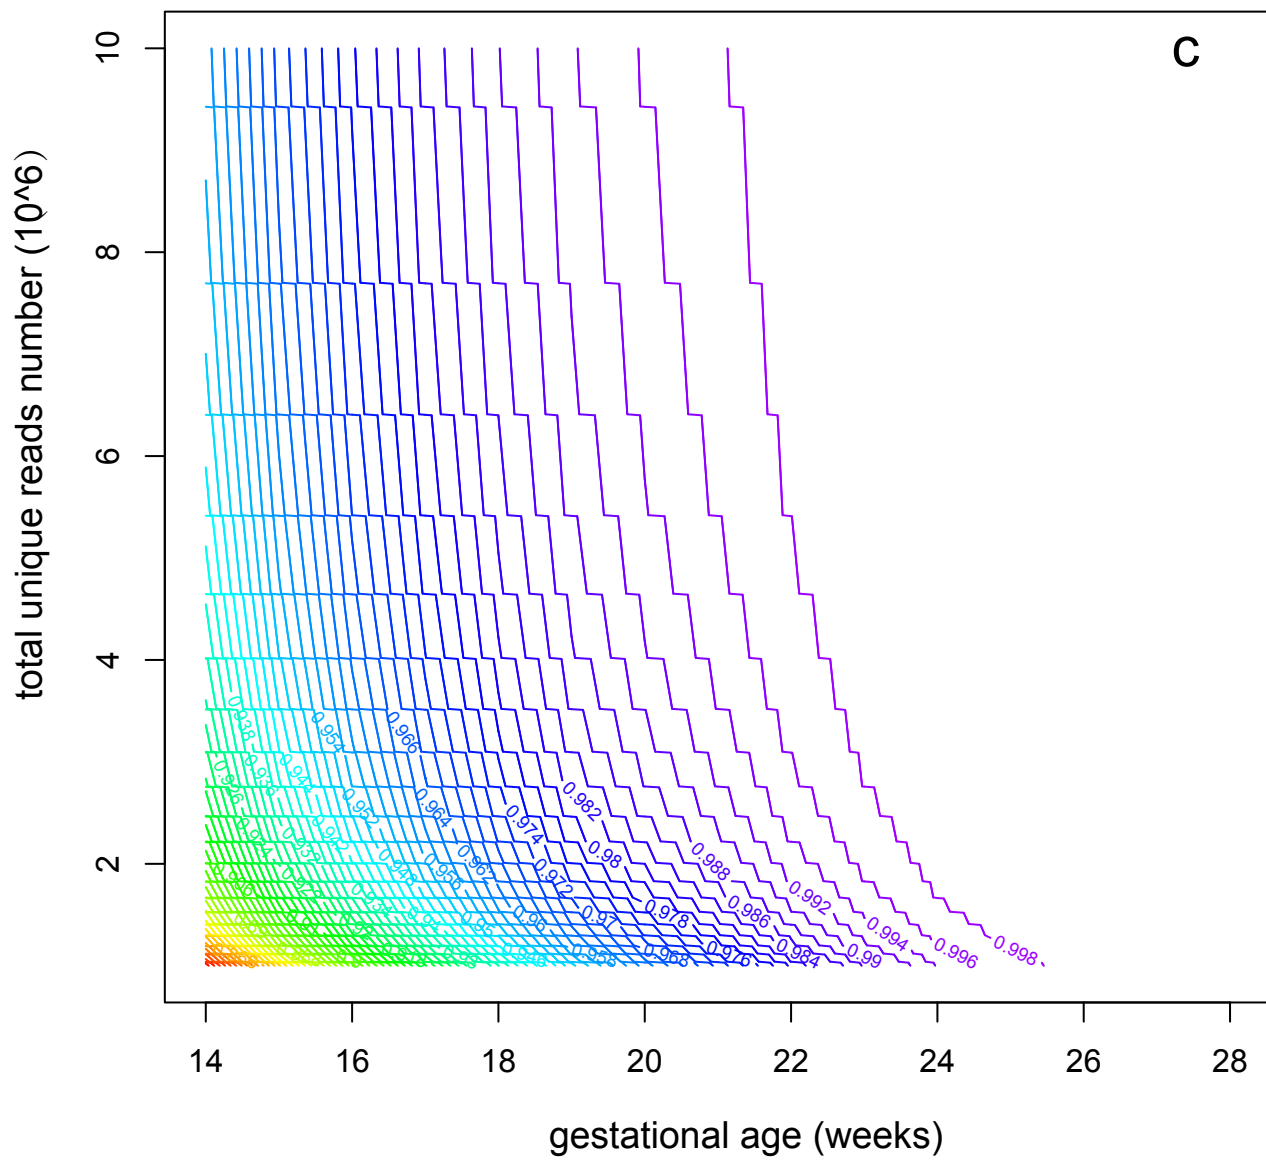

sensitivity of chr18 of male

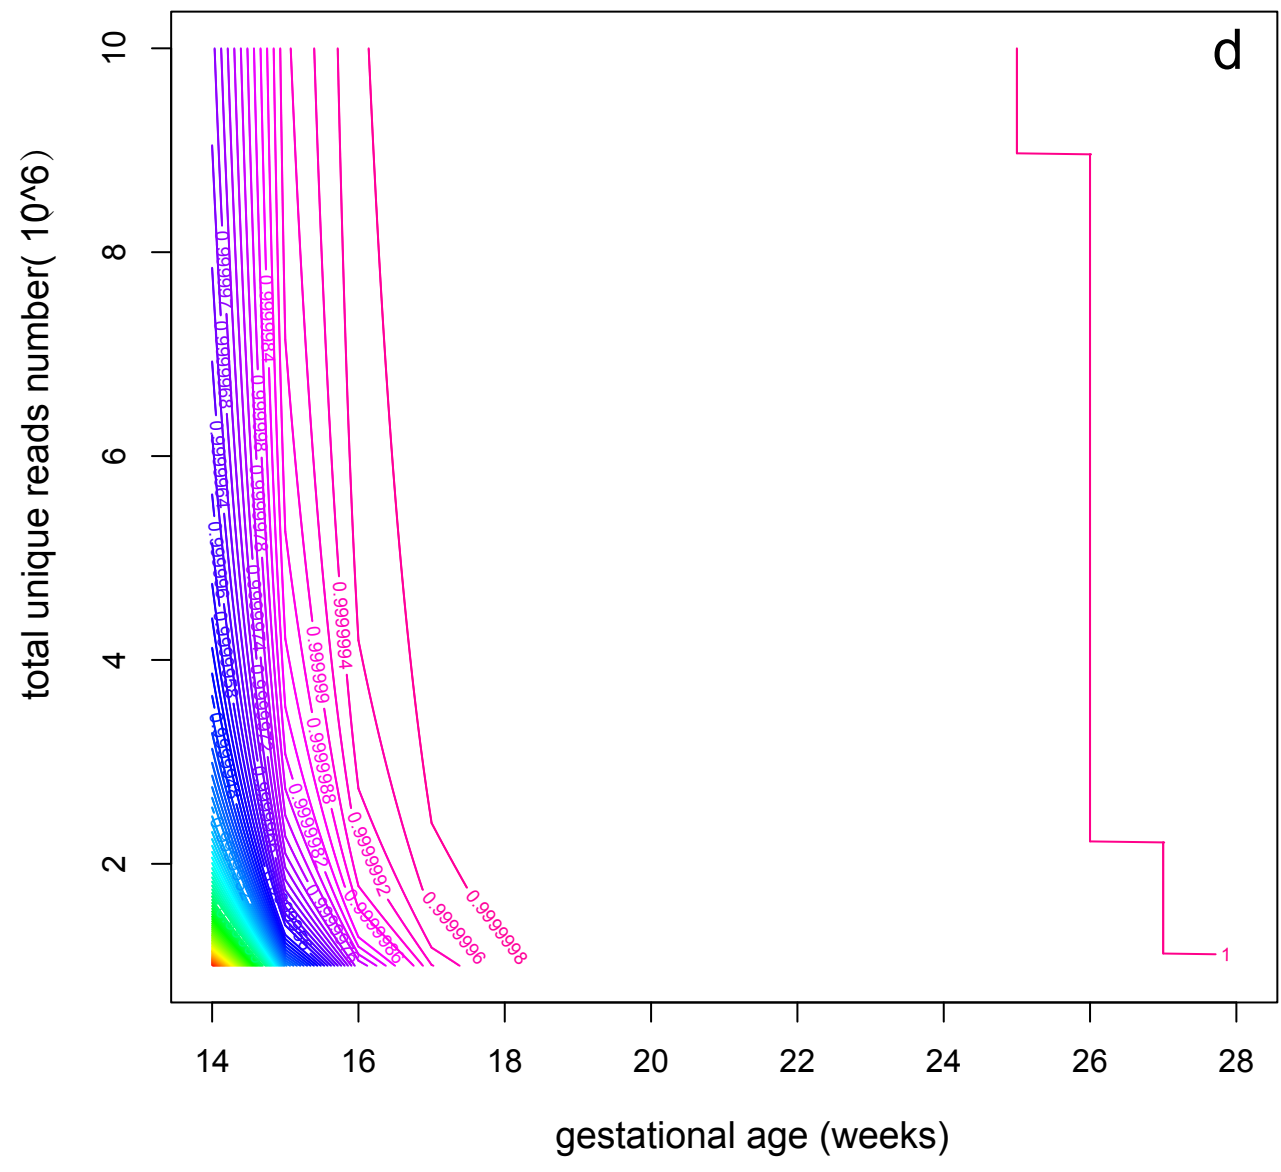

sensitivity of chr21 of female

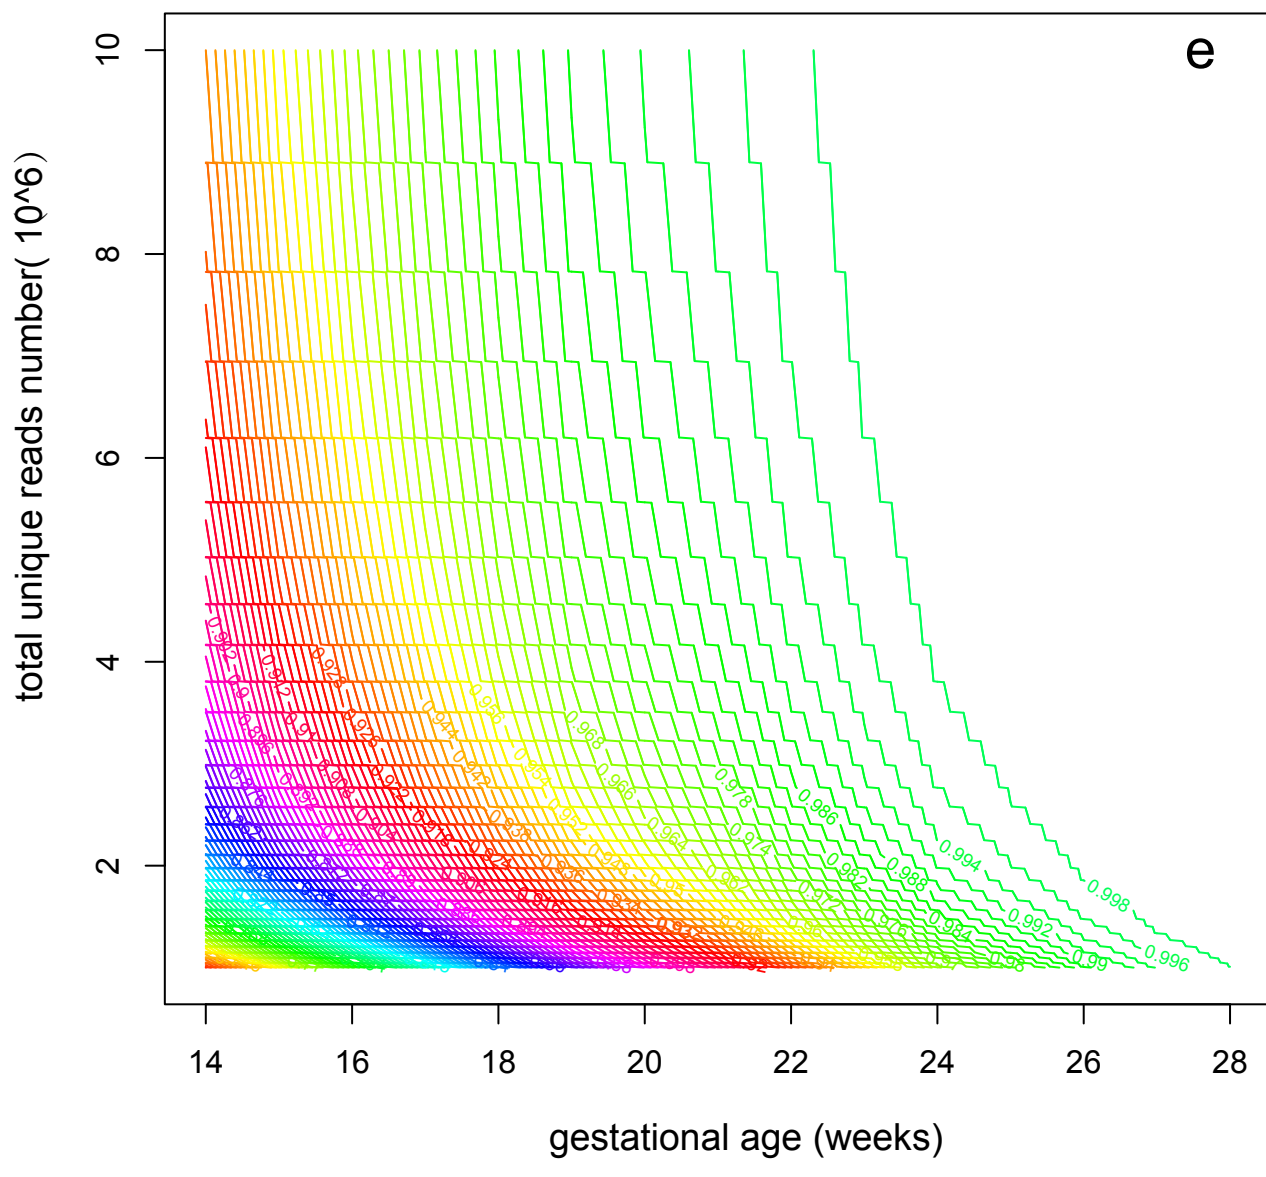

sensitivity of chr21 of male

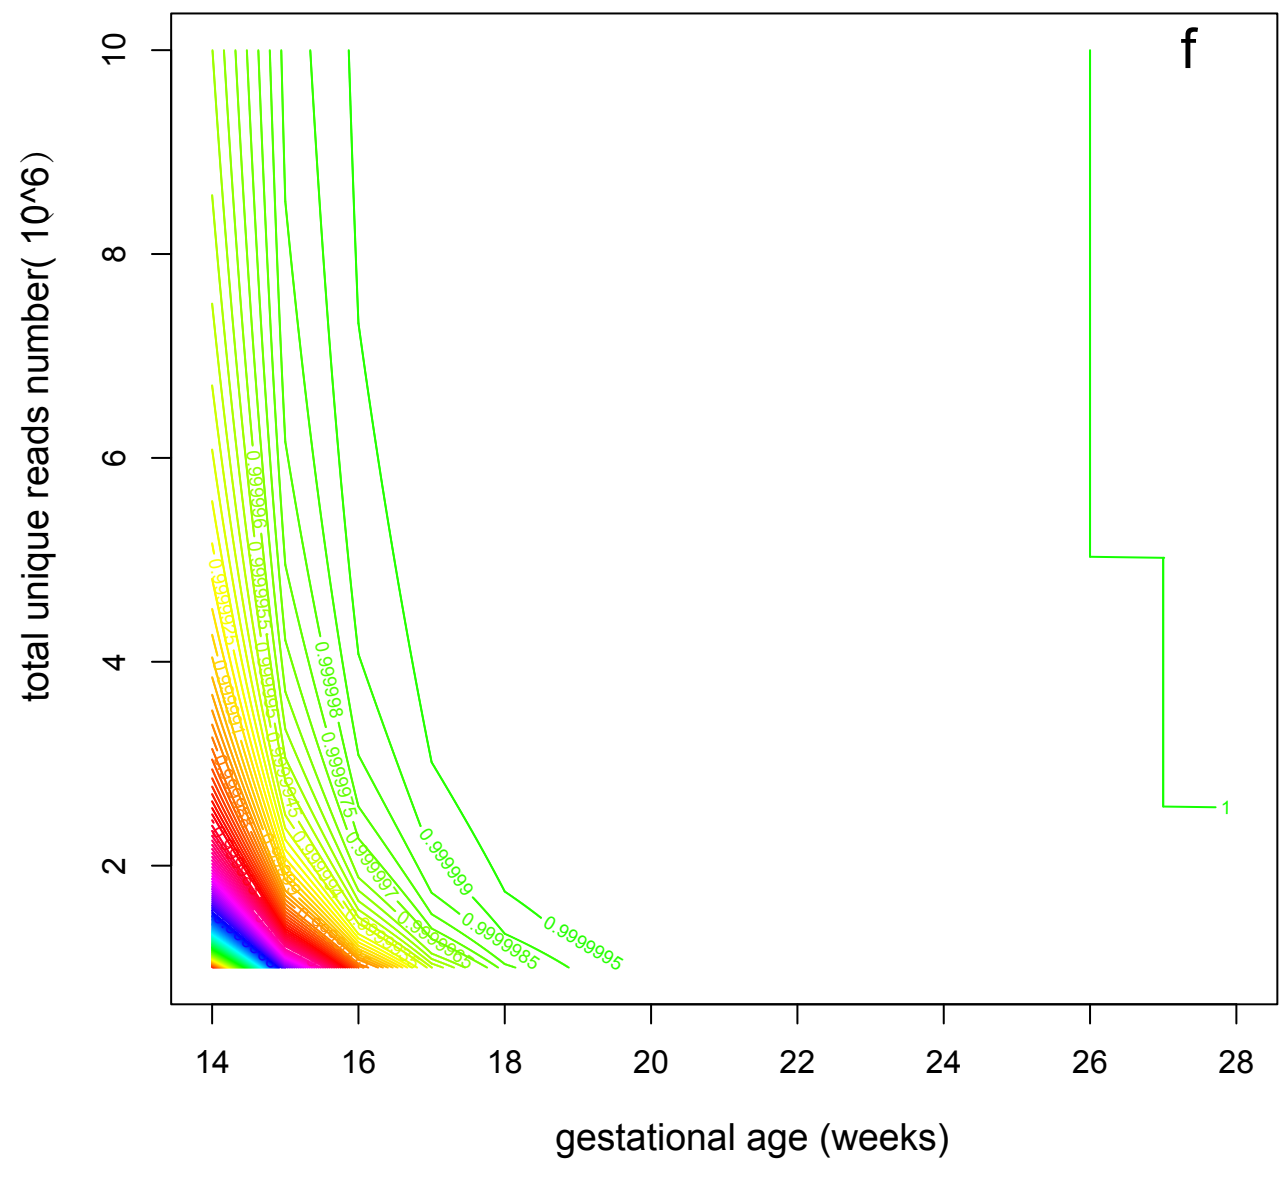

sensitivity of XXX or XO of chrX of female

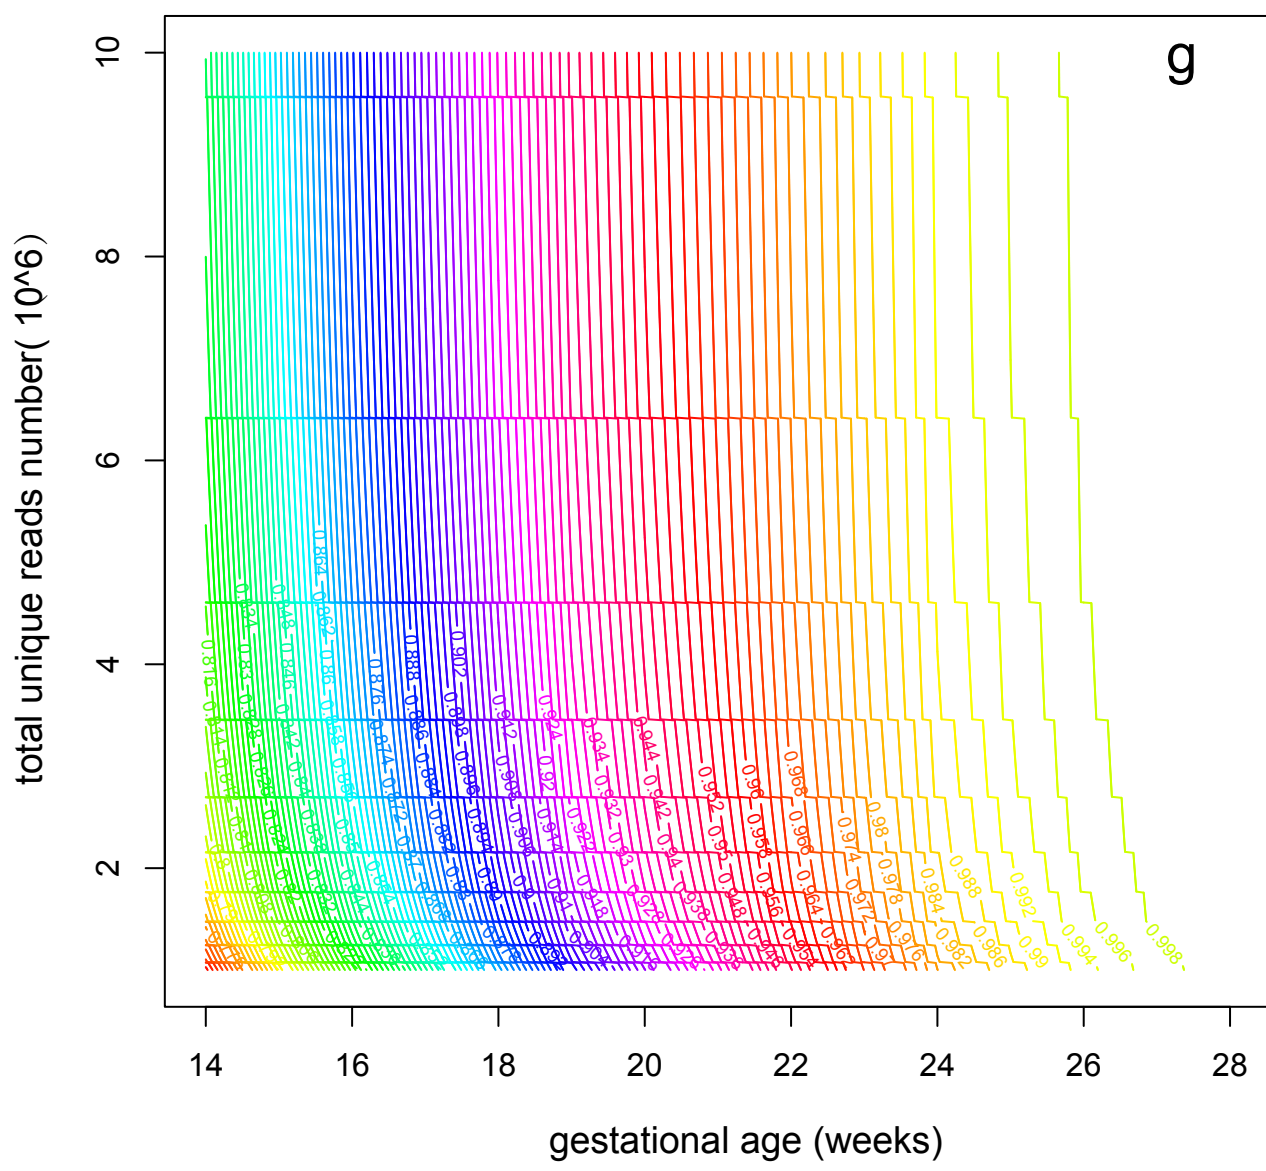

| Gender \ CHR | Female | Male |
|--------------|--------|------|
| T13          | a      | b    |
| T18          | c      | d    |
| T21          | e      | f    |
| XO/XXX       | g      | -    |
